# Supplementary material for: The Nutritional Profile of Food Advertising for School-Aged Children via Television: A Longitudinal Approach
Source: MDPI journal article supplement (doi:10.3390/children7110230), 2020-11-17
Supplement: s1 [file s1]

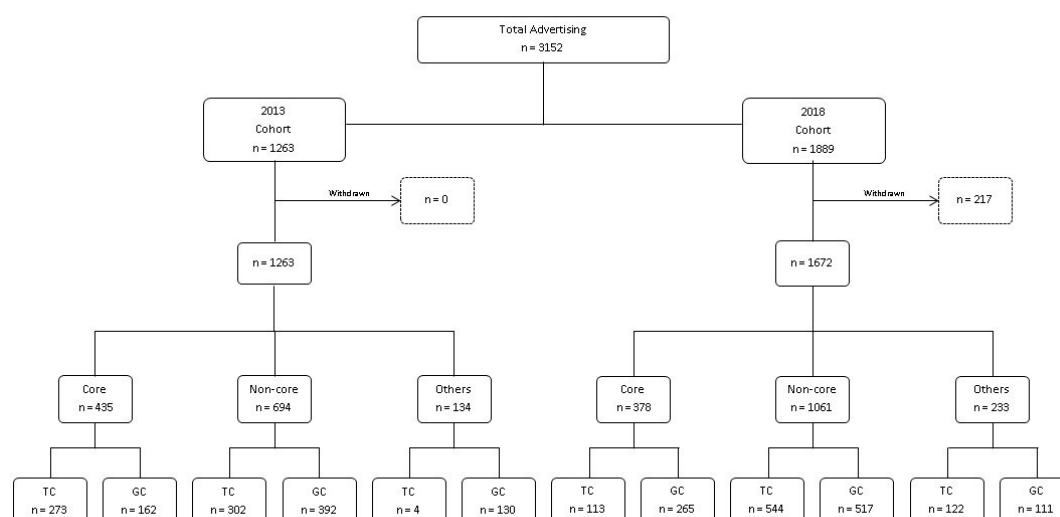

Figure S1. Number of food advertisements broadcast in 2013 and 2018.

**Table S1.** Encoding frames for food advertising categories and criteria for classification according to food nutritional profile advertised.

| Type of Advert                                                                                                     | Subtypes                                                                                                                                                                |
|--------------------------------------------------------------------------------------------------------------------|-------------------------------------------------------------------------------------------------------------------------------------------------------------------------|
| Core Food Advertisements (CFAs)<br>High in energy and unbalanced energy profile                                    | Vegetables and vegetable products without added sugar                                                                                                                   |
|                                                                                                                    | Bottled water                                                                                                                                                           |
|                                                                                                                    | Dairy products (<3 g lipids), low-sugar and high-fiber breakfast cereals (<20 g sugar/100 g and <5 g fiber/100 g)                                                       |
|                                                                                                                    | Low-fat/reduced-fat milk, yoghurt, custard (<3 g fat/100 g), cheese (<15 g fat/100 g), alternatives (including probiotic drinks), infant food (excluding milk formulas) |
|                                                                                                                    | Fruit and fruit products without added sugar                                                                                                                            |
|                                                                                                                    | Meat and similar products (not breaded or battered; including fish, legumes, eggs, nuts, nut products and peanut butter, excluding sugar-coated and salted nuts)        |
|                                                                                                                    | Soups (<2 g lipids/100 g, excluding dehydrates), salads, and sandwiches, frozen meals (<10 g lipids/portion) and low-fat savoury sauces (<10 g lipids/100 g)            |
|                                                                                                                    | Bread (including high-fiber bread and low-fat crackers), rice, pasta and noodles                                                                                        |
| Non-core Food Advertisements (NCFAs) High in energy and unbalanced energy profile                                  | Healthy habits (physical or mental activities related to health)                                                                                                        |
|                                                                                                                    | Frozen/fried potato products (excluding chips)                                                                                                                          |
|                                                                                                                    | Ice cream and iced confections                                                                                                                                          |
|                                                                                                                    | Fruit juice and fruit drinks                                                                                                                                            |
|                                                                                                                    | Breaded or battered meat and similar products and high-fat frozen meals (>10 g lipids/100 g)                                                                            |
|                                                                                                                    | Alcohol                                                                                                                                                                 |
|                                                                                                                    | Cakes, muffins, cookies, high-fat crackers, pies, and pastries                                                                                                          |
|                                                                                                                    | Sugar-sweetened drinks, including soft drinks, cordials, sports drinks and flavor additions (including diet varieties)                                                  |
|                                                                                                                    | Snack foods, including chips, extruded snacks, popcorn, snack and granola bars, sugar-sweetened fruit and vegetable products, and sugar-coated or salted nuts           |
|                                                                                                                    | High-sugar or low-fiber breakfast cereals (>20 g sugar/100 g or <5 g fiber/100 g)                                                                                       |
|                                                                                                                    | Whole milk, yoghurt, custard, dairy desserts (>3 g fat/100 g), cheese and similar products                                                                              |
|                                                                                                                    | High-fat, high-sugar, high-salt spreads (excluding peanut butter), oils and high-fat savoury sauces                                                                     |
| Other Food Advertisements (OFAs)<br>Special food such as vitamins, supplements and baby formulas, and supermarkets | Chocolate and confectionery (including regular and sugar-free chewing gum and sugar)                                                                                    |
|                                                                                                                    | Fast-food restaurants and meals (including “healthy” alternatives)                                                                                                      |
|                                                                                                                    | Baby and toddler milk formulas                                                                                                                                          |
|                                                                                                                    | Vitamin and mineral supplements                                                                                                                                         |
|                                                                                                                    | Supermarkets that advertise mostly core foods                                                                                                                           |
|                                                                                                                    | Tea and coffee                                                                                                                                                          |
|                                                                                                                    | Supermarkets that advertise mostly non-core foods                                                                                                                       |
|                                                                                                                    | Supermarkets with no specified food (generic advertisements or not clearly for core or non-core foods)                                                                  |

**Table S2.** Relative risk of seeing non-core food adverts on children's TV channels in 2018 vs. 2013.

| NCFA Category                                                                                                                                                 | R.R.   | C.I. 95% |         | $\chi^2$ correct | d.f. | p-Value |
|---------------------------------------------------------------------------------------------------------------------------------------------------------------|--------|----------|---------|------------------|------|---------|
|                                                                                                                                                               |        | Lower    | Upper   |                  |      |         |
| Ice cream and iced confections                                                                                                                                | 0.018  | 0.002    | 0.128   | 54.999           | 1    | <0.001  |
| Breaded or battered meat and similar products and high-fat frozen meals                                                                                       | 3.504  | 1.561    | 7.864   | 10.647           | 1    | <0.001  |
| Cakes, muffins, cookies, high-fat crackers, pies and pastries                                                                                                 | 29.730 | 4.099    | 215.631 | 27.930           | 1    | <0.001  |
| Snack foods, including chips, extruded snacks, popcorn, snack and granola bars, sugar-sweetened fruit and vegetable products, and sugar-coated or salted nuts | 1.009  | 0.510    | 1.995   | 0.001            | 1    | ns      |
| High-sugar or low-fiber breakfast cereals                                                                                                                     | 2.091  | 1.585    | 2.758   | 29.707           | 1    | <0.001  |
| Whole milk, yoghurt, custard, dairy desserts, cheese and similar products                                                                                     | 0.831  | 0.677    | 1.020   | 3.143            | 1    | ns      |
| Chocolate and confectionery                                                                                                                                   | 16.054 | 6.592    | 39.099  | 73.583           | 1    | <0.001  |
| Fast-food restaurants or meals                                                                                                                                | 0.773  | 0.451    | 1.324   | 0.883            | 1    | ns      |

NCFA, non-core food advertisement; RR, relative risk; CI, confidence interval;  $\chi^2$  correct, adjusted chi-squared; d.f., degree of freedom; ns, non-significant. Significance level for statistical tests: *p*-value < 0.05.

**Table S3.** Odds ratios of exposure to non-core food adverts on children's and general TV channels in 2018.

| Non-Core Food Adverts                                                                                                                                         | OR    | C.I. 95% |       | $\chi^2$ correct | d.f. | p-Value |
|---------------------------------------------------------------------------------------------------------------------------------------------------------------|-------|----------|-------|------------------|------|---------|
|                                                                                                                                                               |       | Lower    | Upper |                  |      |         |
| Breaded or battered meat and similar products and high-fat frozen meals                                                                                       | 3.906 | 1.912    | 7.978 | 16.126           | 1    | <0.001  |
| Cakes, muffins, cookies, high-fat crackers, pies and pastries                                                                                                 | 3.664 | 1.945    | 6.902 | 18.347           | 1    | <0.001  |
| Snack foods, including chips, extruded snacks, popcorn, snack and granola bars, sugar-sweetened fruit and vegetable products, and sugar-coated or salted nuts | 0.834 | 0.458    | 1.518 | 0.355            | 1    | ns      |
| High-sugar or low-fiber breakfast cereals                                                                                                                     | 2.574 | 1.942    | 3.412 | 45.337           | 1    | <0.001  |
| Whole milk, yoghurt, custard, dairy desserts, cheese and similar products                                                                                     | 2.764 | 2.050    | 3.728 | 47.009           | 1    | <0.001  |
| Chocolate and confectionery                                                                                                                                   | 0.830 | 0.634    | 1.088 | 1.825            | 1    | ns      |
| Fast-food restaurants or meals                                                                                                                                | 0.260 | 0.166    | 0.407 | 39.185           | 1    | <0.001  |

OR, odds ratio; CI, confidence interval;  $\chi^2$  correct, adjusted chi-squared; d.f., degree of freedom; ns, non-significant. Significance level for statistical tests:  $p$ -value < 0.05.
